# Supplementary material for: Supramolecular Self-Assembly Built by Weak Hydrogen, Chalcogen, and Unorthodox Nonbonded Motifs in 4-(4-Chlorophenyl)-3-[(4-fluorobenzyl)sulfanyl]-5-(thiophen-2-yl)-4H-1,2,4-triazole, a Selective COX-2 Inhibitor: Insights from X-ray and Theoretical Studies
Source: PubMed Central journal article supplement — ACS Omega. 2021 Mar 3;6(10):6996–7007. doi: 10.1021/acsomega.0c06287 (PMC7970574; doi:10.1021/acsomega.0c06287), 2021-03-03
Supplement: ao0c06287_si_001.pdf [file ao0c06287_si_001.pdf]

## Supporting information

### **Supramolecular Self-Assembly Built by Weak Hydrogen, Chalcogen and Unorthodox Nonbonded Motifs in 4-(4-chlorophenyl)-3-[(4-fluorobenzyl)sulfanyl]-5-(thiophen-2-yl)-4H-1,2,4-triazole, a Selective COX-2 Inhibitor: Insights from X-ray and Theoretical Studies**

Lamya H. Al-Wahaibi<sup>a</sup>, Bavanandan Rahul<sup>b</sup>, Ahmed A. B. Mohamed<sup>c</sup>, Mohammed S. M. Abdelbaky<sup>d</sup>, Santiago Garcia-Granda<sup>d</sup>, Ali A. El-Emam<sup>c</sup>, M. Judith Percino<sup>e</sup> and Subbiah Thamocharan<sup>b\*</sup>

<sup>a</sup> *Department of Chemistry, College of Sciences, Princess Nourah bint Abdulrahman University, Riyadh 11671, Saudi Arabia*

<sup>b</sup> *Biomolecular Crystallography Laboratory, Department of Bioinformatics, School of Chemical and Biotechnology, SASTRA Deemed University, Thanjavur-613 401, India*

<sup>c</sup> *Department of Medicinal Chemistry, Faculty of Pharmacy, Mansoura University, Mansoura 35516, Egypt*

<sup>d</sup> *Department of Physical and Analytical Chemistry, Faculty of Chemistry, Oviedo University-CINN, Oviedo 33006, Spain*

<sup>e</sup> *Unidad de Polímeros y Electrónica Orgánica, Instituto de Ciencias, Benemérita Universidad Autónoma de Puebla, Val3-Ecocampus Valsequillo, Independencia O2 Sur 50, San Pedro Zacachimalpa, Puebla-C.P.72960, México.*

---

Corresponding author.

*E-mail address: thamu@scbt.sastra.edu (S. Thamocharan).*

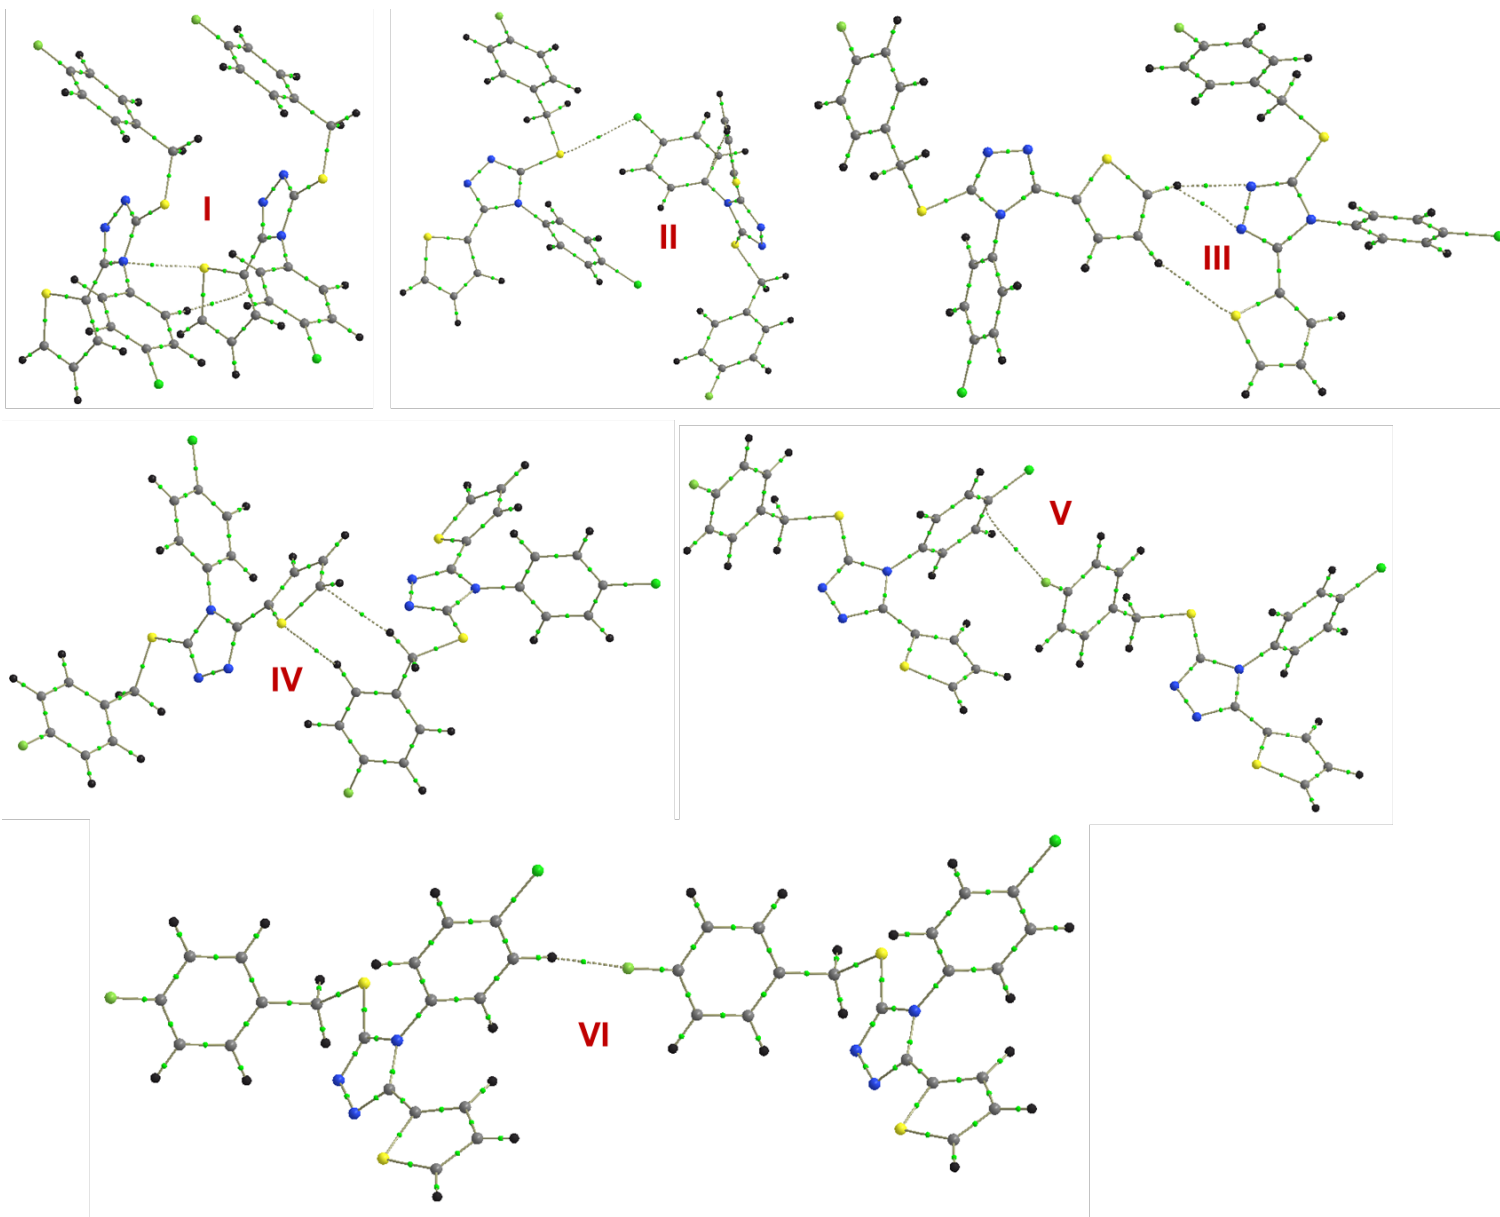

Figure S1. Molecular graphs showing the intermolecular interactions in different molecular pairs (I-VI) of the title compound.

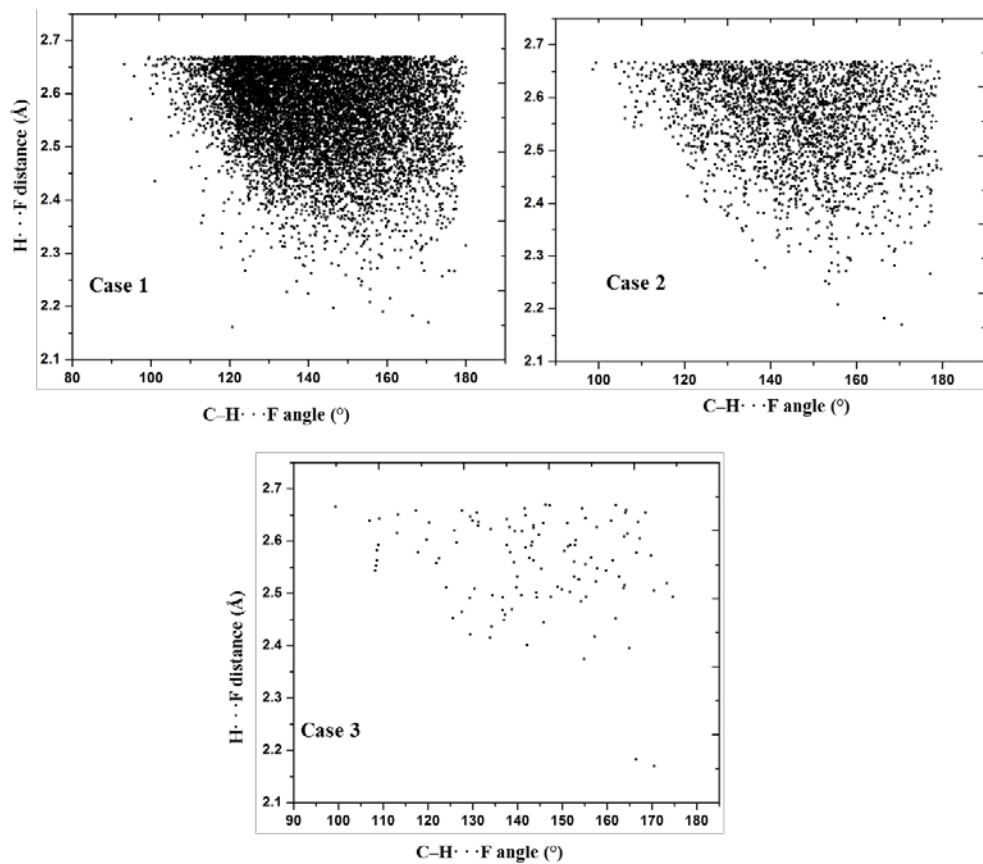

Figure S2. The distribution of C–H...F contacts (distance and angle) for three different cases (see Scheme 2).

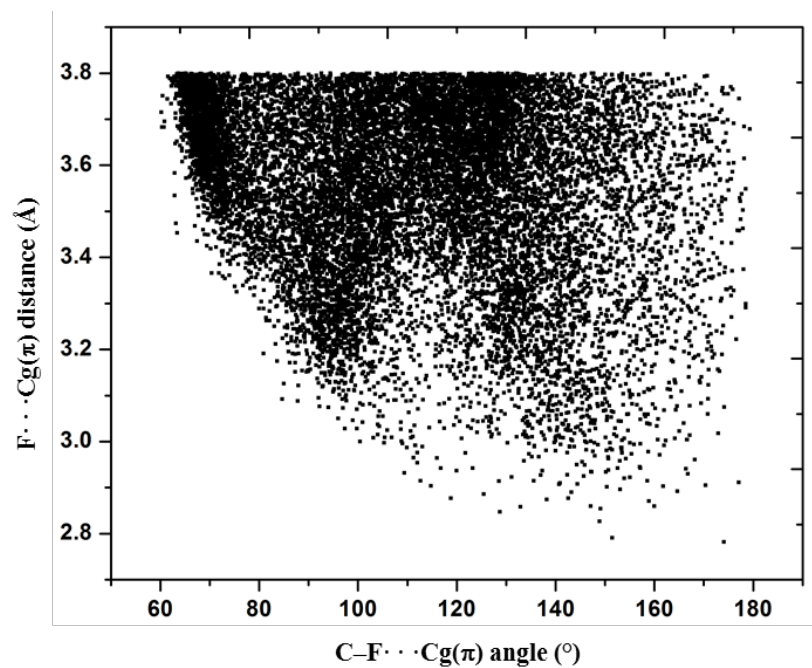

Figure S3. The distribution of C-F...Cg( $\pi$ ) contacts

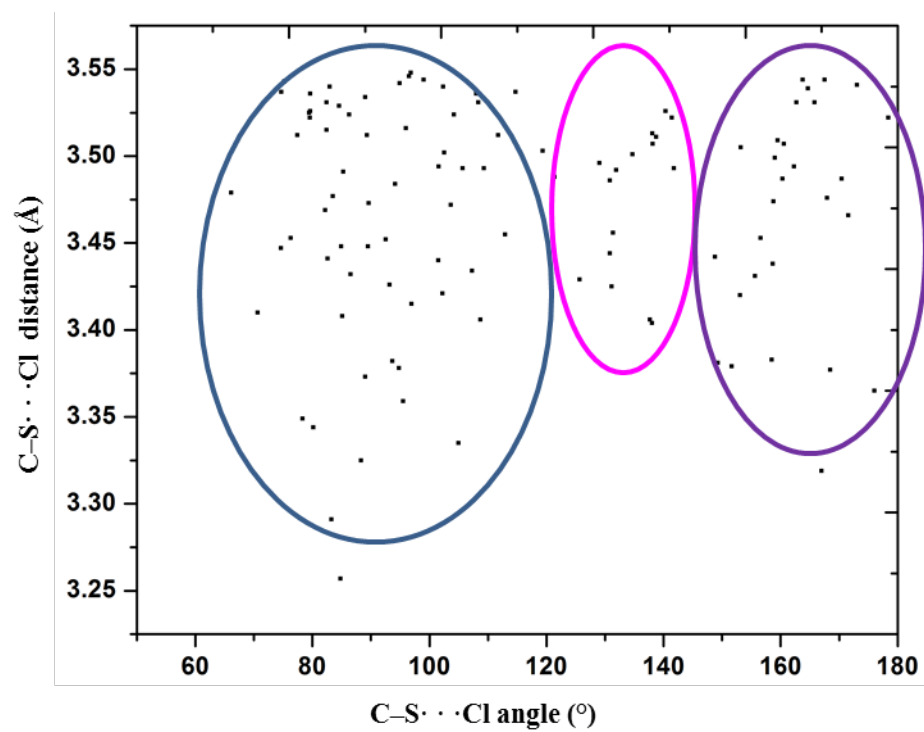

Figure S4. The distribution of C-S...Cl contacts.
